# Supplementary material
Source: Springer Nature journal article supplement (https://www.springermedizin.de/resource/supplementary/13012_2011_397_MOESM7_ESM.pdf/9629910)

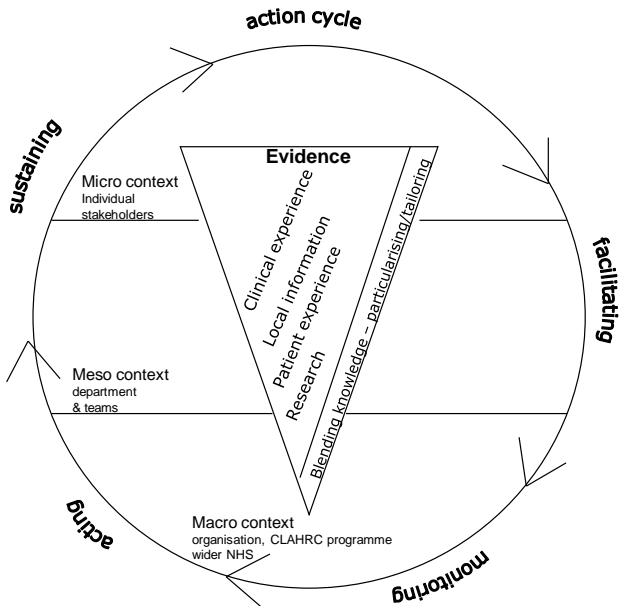

Figure 1: Study conceptual framework

Supplement: MOESM7 [file 9629910]
